# Supplementary material
Source: PubMed Central journal article supplement (PMC8527933)
Supplement: JGMED21000451.pdf [file JGMED21000451.pdf]

Cordoza M, Basner M, Asch DA, et al. Sleep and alertness among interns in intensive care compared to general medicine rotations: a secondary analysis of the iCOMPARE trial. *J Grad Med Educ.* 2021;13(5):717–721. <http://dx.doi.org/10.4300/JGME-D-21-00045.1>

### Supplementary Data

TABLE

Mean Sleep Duration, Sleepiness, and Alertness Comparing ICU to GM Interns, Stratified by shift Type

| Shift Type                                      | Proportion Shift Type Selected Out of All Shifts, % | Mean Hours of Sleep, Mean (SE <sup>a</sup> ) | Mean Score on KSS <sup>b</sup> , Mean (SE) | Mean Number of PVT-B <sup>c</sup> Lapses, Mean (SE) |
|-------------------------------------------------|-----------------------------------------------------|----------------------------------------------|--------------------------------------------|-----------------------------------------------------|
| <b>ICU N = 125</b>                              |                                                     |                                              |                                            |                                                     |
| Regular day shift                               | 44.1*                                               | 6.7 (0.8)                                    | 4.4 (1.4)                                  | 5.2 (6.3)                                           |
| Regular night shift                             | 4.0                                                 | 7.4 (2.3)                                    | 5.1 (1.7)                                  | 6.8 (7.9)                                           |
| Beginning extended overnight shift <sup>d</sup> | 11.0*                                               | 7.3 (1.1)*                                   | 4.0 (1.8)                                  | 4.3 (5.1)                                           |
| Finishing extended overnight shift              | 11.1*                                               | 5.3 (2.1)                                    | 7.1 (1.3)                                  | 8.2 (8.0)                                           |
| Work days overall                               | 87.3                                                | 6.5 (0.8)                                    | 4.9 (1.2)                                  | 4.9 (1.2)                                           |
| Day off                                         | 12.7                                                | 9.1 (1.6)                                    | 4.0 (1.8)                                  | 4.6 (6.1)                                           |
| Other                                           | 17.1                                                | 6.5 (2.6)                                    | 5.2 (1.9)                                  | 5.2 (6.9)                                           |
| <b>GM N = 261</b>                               |                                                     |                                              |                                            |                                                     |
| Regular day shift                               | 53.4                                                | 6.9 (0.9)                                    | 4.7 (1.4)                                  | 5.5 (6.0)                                           |
| Regular night shift                             | 3.9                                                 | 7.4 (1.7)                                    | 5.4 (1.5)                                  | 6.9 (7.6)                                           |
| Beginning extended overnight shift              | 7.7                                                 | 7.9 (1.3)                                    | 4.5 (1.7)                                  | 4.9 (5.7)                                           |
| Finishing extended overnight shift              | 7.6                                                 | 5.0 (2.3)                                    | 6.7 (1.4)                                  | 7.7 (7.4)                                           |
| Work days overall                               | 87.3                                                | 6.7 (0.9)                                    | 4.9 (1.2)                                  | 4.9 (1.2)                                           |
| Day off                                         | 12.7                                                | 8.9 (1.7)                                    | 4.2 (1.7)                                  | 4.0 (5.3)                                           |
| Other                                           | 14.7                                                | 6.3 (1.8)                                    | 5.1 (1.8)                                  | 7.1 (7.6)                                           |

Abbreviations: ICU, intensive care unit; GM, general medicine.

<sup>a</sup> Standard error.

<sup>b</sup> Karolinska Sleepiness Scale.

<sup>c</sup> 3-minute Psychomotor Vigilance Test.

<sup>d</sup> Extended overnight shift: shift spanning >16 hours in duration.

\* Indicates a significant difference ( $P < .05$ ) comparing ICU to GM.
